# Supplementary material for: Iron status influences mitochondrial disease progression in Complex I-deficient mice
Source: eLife journal article supplement (doi:10.7554/elife.75825), 2023-02-17

**Figure 3 – Source Data 1 – Olfactory Bulb**

GFAP

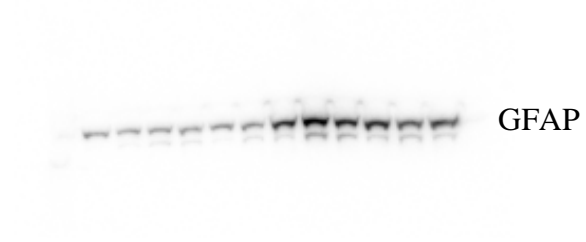

Total Protein

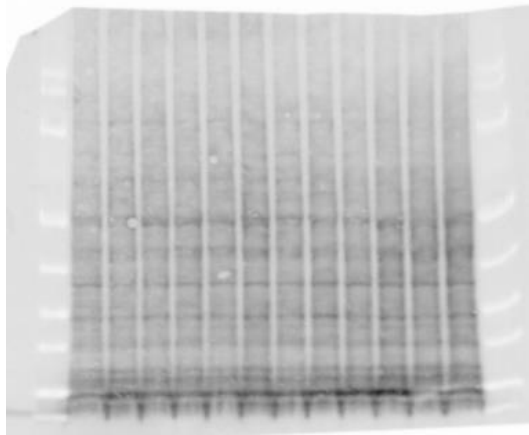

**Figure 3 – Source Data 1 – Cerebellum**

GFAP

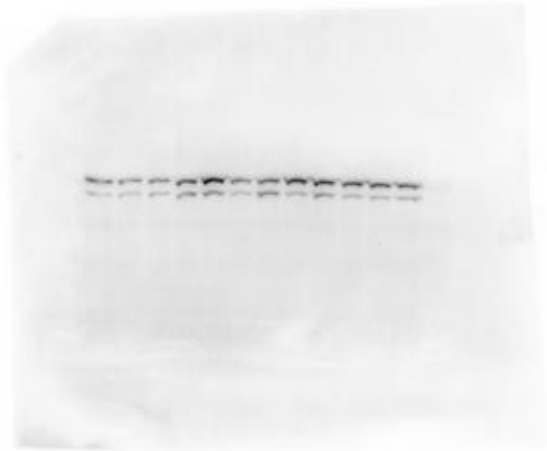

GFAP

Total Protein

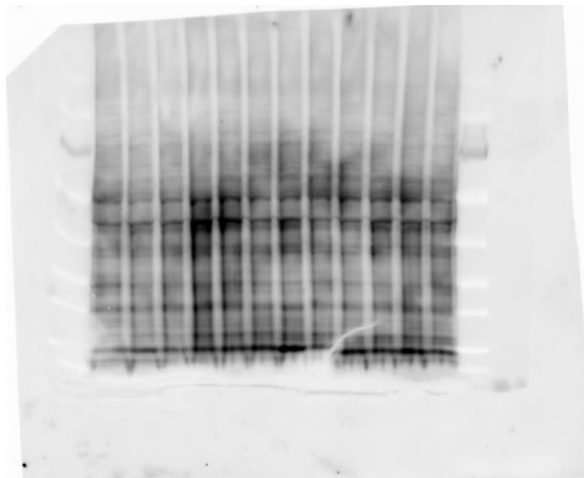

**Figure 3 – Source Data 1 – Cortex**

GFAP

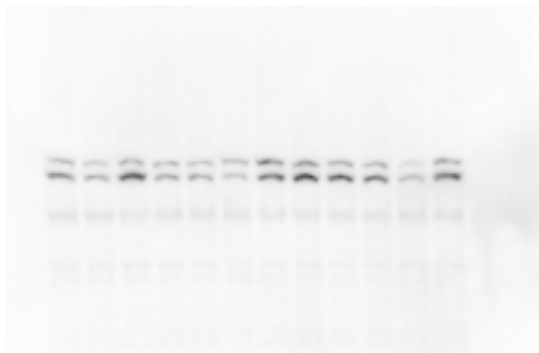

GFAP

Total Protein

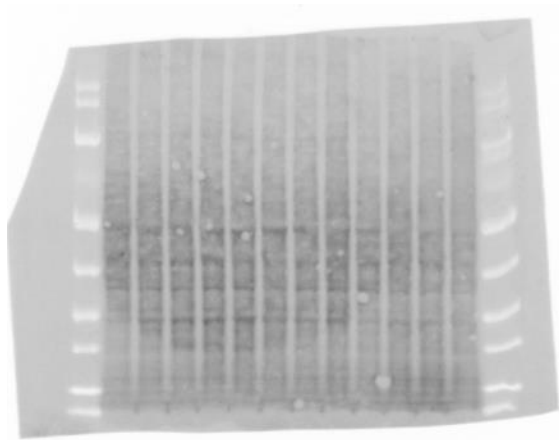

Supplement: fig3-data1 [file Figure 3 - Source Data 1.pdf › Figure 3 - Source Data 1/Figure 3 - Source Data 1.pdf]
