# Supplementary material for: Iron status influences mitochondrial disease progression in Complex I-deficient mice
Source: eLife journal article supplement (doi:10.7554/elife.75825), 2023-02-17

High exposure (TFR1, FPN1, FTH1, DMT1)

High exposure (TFR1, FPN1, FTH1, DMT1)

Western blot analysis showing the expression of TFR1, FPN1, actin, and FTH1 in HepG2 cells. The blot displays four rows of bands corresponding to these proteins across 12 lanes. The lanes are grouped into four sets of three, representing different experimental conditions. TFR1 and FPN1 bands are prominent in the first two groups, while actin bands are consistent across all lanes. FTH1 bands are visible in the last two groups, indicating iron loading.

Gel 1

IRP1

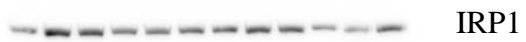

IRP2

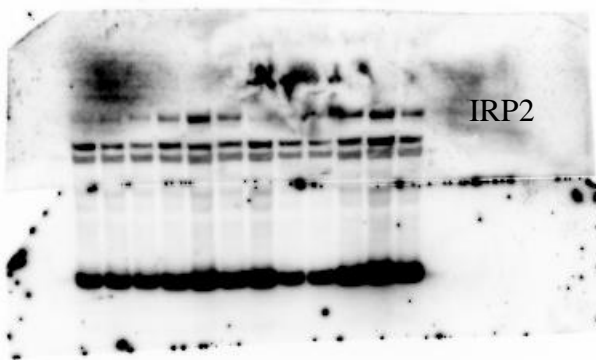

**Figure 4 – Source Data 1 – Male**

FTH1

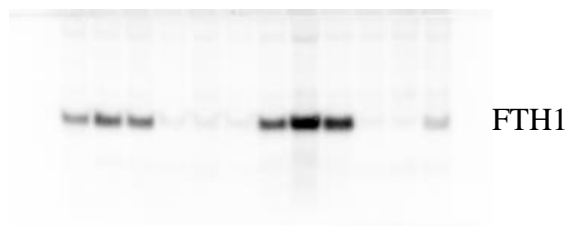

DMT1

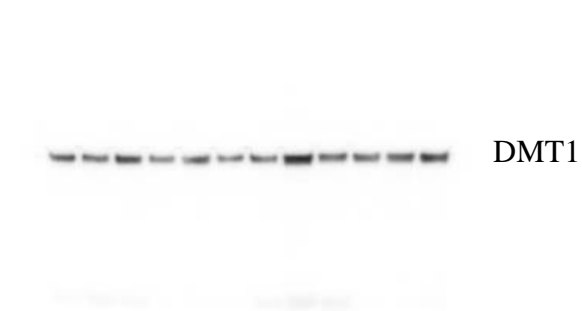

TFR1

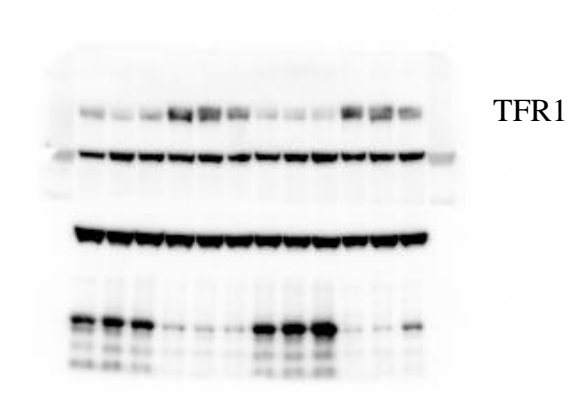

FPN1

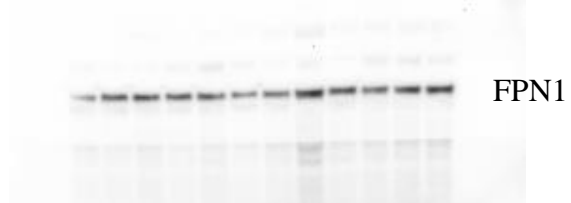

IRP1

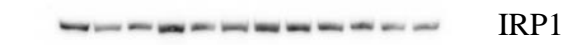

IRP2

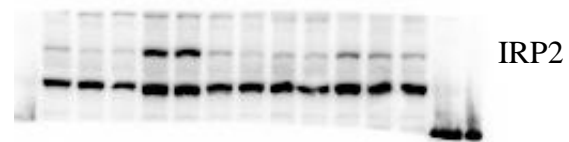

Actin

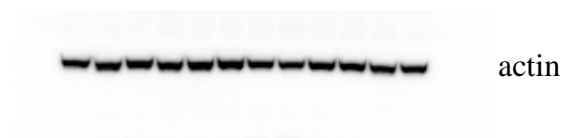

Supplement: fig4-data1 [file elife-75825-fig4-data1-v2.zip]
