# Supplementary material for: Iron status influences mitochondrial disease progression in Complex I-deficient mice
Source: eLife. 2023 Feb 17;12:e75825. doi: 10.7554/eLife.75825 (PMC10030112; doi:10.7554/eLife.75825)
Supplement: Figure 3—source data 1. [file elife-75825-fig3-data1.zip]

Archive with 7 entries (7 files):
- Figure 3 - Source Data 1/Figure 3 - Source Data 1 Cerebellum GFAP.tif
- Figure 3 - Source Data 1/Figure 3 - Source Data 1 Cerebellum Total.tif
- Figure 3 - Source Data 1/Figure 3 - Source Data 1 Cortex GFAP.tif
- Figure 3 - Source Data 1/Figure 3 - Source Data 1 Cortext Total.tif
- Figure 3 - Source Data 1/Figure 3 - Source Data 1 OlfBulb GFAP.tif
- Figure 3 - Source Data 1/Figure 3 - Source Data 1 OlfBulb Total.tif
- Figure 3 - Source Data 1/Figure 3 - Source Data 1.pdf
